# Supplementary material
Source: publisher site journal article supplement (https://en-cdn.bio-protocol.org/attached/file/20210927/Supplementary%20file%20LI850%20respiration.R.docx)
Supplement: Supplementary file 1 [file Supplementary%20file%20LI850%20respiration.R.docx]

## Dark respiration measurement from shoots in Arabidopsis

## bio-protocol for LI-850 CO2/H2O Gas Analyzer data processing

## Author: Jose P. Fonseca, Marcus Griffiths, Larry M. York, and Kirankumar S. Mysore

## Institution: Noble Research Institute LLC

library(tidyverse)

library(basicTrendline)

library(minpack.lm)

##enter experiment parameters

expname <- "JF" #experiment name for filenames

expnumber <- "2" #experiment number for filenames

f <- function (file, starttime = 61, endtime = 150){

rawdat <- read_delim(file,delim= "\t")## read raw data file

dat <- rawdat[c(starttime:endtime), c(2:4,7)]

##select time, H2O and CO2, and observations from 20 to 90

dat <- as_tibble(dat)

names(dat)[1] <- "Time"#rename

names(dat)[2] <- "CO2"

names(dat)[3] <- "H2O"

names(dat)[4] <- "CellPressure"

dat$CO2<-as.numeric(as.character(dat$CO2))

dat$H2O<-as.numeric(as.character(dat$H2O))

dat$second <- (starttime:endtime)

dat$CO2dry <- dat$CO2/(1-((dat$H2O)/1000)) #Correction for water

# View(dat)

data1<-dat[c(1:90),]

rawflux.lin<-data.frame(trendline_summary(data1$second, data1$CO2dry,model="line2P"))

##Plotting

trendline(data1$second,

data1$CO2dry,

model="line2P",

xname="time",

yname=paste("CO"[2]),

ePos.x = "topleft",

summary=TRUE,

eDigit=5)#linear fitting

CellPressure_kPa <- mean(data1$CellPressure)

# return a vector

c("dc/dt_lin" = rawflux.lin$parameter.a,

"R.2_lin" = rawflux.lin$R.squared,

"CellPressure" = CellPressure_kPa) #printout linear dc/dt, linear R2

}

temp <- list.files(pattern = "*.txt")

dat <- t(sapply(temp, f, c(starttime = 61, endtime = 150)))

dat <- as.data.frame(dat)

dat <- tibble::rownames_to_column(dat, "Geno")

dat <- separate(dat, "Geno",

into = c("Geno","Geno1"),

sep = '.txt')

dat <- separate(dat, "Geno",

into = c("Geno","Rep"),

sep = '_')

name <- c("Geno1")

dat <- dat %>% select(-one_of(name))

rm(name)

dir.create("output",showWarnings = TRUE)

write_csv(dat, path=paste("output/",expname,expnumber,"_rootrespiration_linearfit61-150.csv", sep=""))

#####################

## data processing ##

#####################

dat$dc.dt_lin <- dat$`dc/dt_lin`

# Calculate specific root respiration by wt. and length

V <- 7.5 # milli litres (Chamber volume)

R <- 8.3144621 # L k Pa K^(-1) mol^(-1) (Universal Gas constant)

Temperature <- 23 + 273.15 # in Kelvin

## Raw flux (nmol CO2/s)

dat <- mutate(dat,

RawFlux = dc.dt_lin * (CellPressure/R/Temperature) * (V)

)

#Specifc shoot respiration by weight (nmol / s / gfw)

shootweights <- read_csv(file=paste(expname,expnumber,"_shootweights.csv", sep=""))

shootweights$Rep <- as.factor(shootweights$Rep)

dat$Rep <- as.factor(dat$Rep)

dat <- dat %>% full_join(shootweights)

dat <- mutate(dat,

SpecShootCO2flux_nmol.gfw.s = RawFlux / Shootweight_gfw.plant

)

LI-850 CO2/H2O Gas Analyzer)

# Stat summary

summary(dat)

write_csv(dat, path=paste("output/",expname,expnumber,"_rootrespiration_linearfit61-150_processed.csv", sep=""))

ggplot((dat, aes(x=Geno, y=SpecShootCO2flux_nmol.gfw.s)) +

geom_boxplot(outlier.shape = NA) +

geom_jitter(position=position_jitter(0.05)) +

theme_bw() +

theme(

plot.background = element_blank()

,panel.grid.major = element_blank()

,panel.grid.minor = element_blank()

) +

# xlab(bquote("Geno")) +

scale_y_continuous(limits=c(0,max(dat$SpecShootCO2flux_nmol.gfw.s*1.1, na.rm = TRUE))) +

ylab(bquote("Specific shoot"~ CO[2]~ " flux (nmol" ~ gfw^-1 ~ s^-1*")"))

ggsave(file=paste("output/",expname,expnumber,"_specificShootRespiration_alldat_0.png"), width=8, height=3.1968, dpi=300)

ggsave(file=paste("output/",expname,expnumber,"_specificShootRespiration_alldat_0.pdf"), width=8, height=3.1968, dpi=300)
